# Supplementary material for: A corepressor participates in LexA-independent regulation of error-prone polymerases in Acinetobacter
Source: PubMed Central journal article supplement (PMC7273328; doi:10.1099/mic.0.000866), 2019-11-05
Supplement: mic-166-212-s001.pdf [file mic-166-212-s001.pdf]

Supplemental Table 1. RT-qPCR primers

| Gene locus*                | Forward primer          | Reverse primer           |
|----------------------------|-------------------------|--------------------------|
| A1S_0408 ( <i>gst</i> )    | TGGGAAAGTGCCTGTATTGGT   | TTCGGATCATCTAAAGCAGGTGC  |
| A1S_0636 ( <i>umuD</i> )   | AAGTTGTTGCTCGGTCTCGG    | TGCCGGTGATGGAAATCCTG     |
| A1S_0637 ( <i>umuC</i> )   | TCTGAATCAATGCGCTCAAGACA | TCAAGTGCGGATAGGTTTTTGGCT |
| A1S_1173 ( <i>rumB</i> )   | CGTTTCTGAAGTTTGGGGCG    | CGTAGATCGTGCAGCCATA      |
| A1S_1174 ( <i>umuD</i> )   | CTCTCGACATGAACGAGCAC    | CCGTGTTTGGCATCAAGACT     |
| A1S_1388 ( <i>ddrR</i> )   | GGAAAGTGAAGCAGCCGAAAG   | TGGGTAAGGGGATGTAAGCCT    |
| A1S_1389 ( <i>umuDAb</i> ) | TACCACATTCCTTGGCGAC     | TCCGGCATCTAACATGGACA     |
| A1S_2008 ( <i>umuC</i> )   | TGGAAGACCTCATGCAACAGACA | GCGTGCCATGACCACAGAAA     |
| A1S_2014                   | CTGTTACGAAAAGCCAGC      | TTTGCATAAATCCCCACCAT     |
| A1S_2015 ( <i>umuC</i> )   | TTTGCACTCTAGCCCGTT      | TCAAGCGCAGTCAAACCAC      |
| A1S_2037 ( <i>esvI</i> )   | TGGTTGAAGAGTGGCTCCCT    | GGACCACAACCATATCGCCA     |
| ACIAD 0724 ( <i>nrdA</i> ) | ATGACCGTCGTCGTAATCAC    | GCTGTGCAAATTCCTCGCCA     |
| ACIAD 0445 ( <i>gst</i> )  | ACCTGTACTACTGATGGCG     | ACAGACCTCGTTTCGGATCA     |

\*Gene prefix A1S = *A. baumannii*; prefix ACIAD = *A. baylyi*

Supplemental Table 2. Expression in RNA-Seq experiments of randomly chosen genes not part of the 17978 DNA damage response regulon, in WT vs. *ddrR* mutants

| A1S gene locus chosen randomly* | Expression in untreated WT cells | Expression in untreated JH1700 cells | Expression in MMC-treated WT cells | Expression in MMC-treated JH1700 cells |
|---------------------------------|----------------------------------|--------------------------------------|------------------------------------|----------------------------------------|
| 729                             | 152.54                           | 77.31                                | 150.68                             | 75.74                                  |
| 3349                            | 631.83                           | 692.09                               | 481.64                             | 731.41                                 |
| 2962                            | 410.73                           | 468.01                               | 403.51                             | 670.14                                 |
| 2219                            | 70.46                            | 26.69                                | 72.73                              | 17.32                                  |
| 3525                            | 44.72                            | 138.26                               | 56.25                              | 146.30                                 |
| 1033                            | 107.99                           | 38.39                                | 117.27                             | 58.84                                  |
| 1619                            | 499.49                           | 336.28                               | 386.38                             | 235.28                                 |
| 2943                            | 106.28                           | 19.62                                | 139.60                             | 30.89                                  |
| 743                             | 107.05                           | 19.36                                | 103.94                             | 28.48                                  |
| 268                             | 3150.59                          | 3932.55                              | 1801.98                            | 2567.42                                |
| 694                             | 87.64                            | 31.56                                | 95.67                              | 33.41                                  |
| 635                             | 67.94                            | 42.03                                | 123.00                             | 57.49                                  |
| 425                             | 71.20                            | 40.04                                | 88.67                              | 46.42                                  |
| 1658                            | 121.47                           | 210.52                               | 86.05                              | 131.99                                 |
| 827                             | 983.49                           | 952.17                               | 432.43                             | 1049.13                                |
| 2915                            | 457.76                           | 598.83                               | 243.62                             | 527.45                                 |
| 2736                            | 1136.15                          | 1725.66                              | 440.62                             | 1588.37                                |
| 3505                            | 155.72                           | 94.91                                | 157.47                             | 99.85                                  |
| 300                             | 60.92                            | 44.47                                | 96.72                              | 57.46                                  |
| 1649                            | 78.27                            | 73.95                                | 74.92                              | 46.17                                  |

\*Twenty random numbers between 1 and 3877 inclusive (corresponding to the A1S gene locus identifiers of the 17978 genome) were chosen by the Google random number generator.
